# Supplementary material for: Simple green synthesis of solid polymeric bisphenol A bis(diphenyl phosphate) and its flame retardancy in epoxy resins
Source: Royal Society of Chemistry journal article supplement (doi:10.1039/c5ra06762f), 2015-01-01
Supplement: c5ra06762f1.pdf [file c5ra06762f1.pdf]

**Simple Green Synthesis of Solid Polymeric Bisphenol A bis(diphenyl phosphate)  
and its Flame Retardancy in Epoxy Resins**

Wei Zhao <sup>a</sup>, Jiping Liu <sup>a,1</sup>, Yi Zhang <sup>a</sup>, Xiaolu Bi <sup>a</sup>, Daming Ban<sup>a</sup>

*<sup>a</sup> School of Material Science and Engineering, Beijing Institute of Technology, Beijing,*

*100081, P. R. China*

Corresponding author

\* E-mail: liujp@bit.edu.cn; Tel. (Fax): +86 10 6891 4530.

---

<sup>1</sup> Corresponding author. Tel. & Fax: +86-10-6891-4530. E-mail address: liujp@bit.edu.cn (J. Liu).

Contents

**DSC curve of PBDP.**

## DSC curve of PBDP

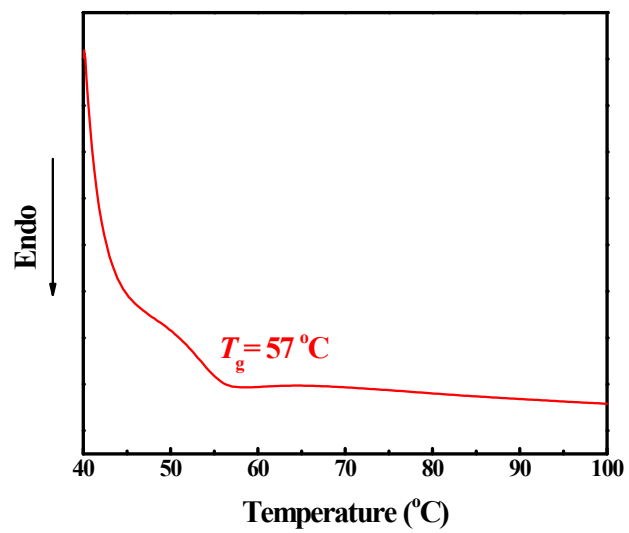

**Figure S1.** DSC curve of the synthesized PBDP.
